# Supplementary material for: The crystal structure of human Rogdi provides insight into the causes of Kohlschutter-Tönz Syndrome
Source: PubMed Central journal article supplement (PMC5479863; doi:10.1038/s41598-017-04120-x), 2017-06-21
Supplement: 41598_2017_4120_MOESM1_ESM.pdf [file 41598_2017_4120_MOESM1_ESM.pdf]

# **The crystal structure of human Rogdi provides insight into the causes of Kohlschutter-Tönz Syndrome**

Hakbong Lee<sup>1,4</sup>, Hanbin Jeong<sup>1,4</sup>, Joonho Choe<sup>2</sup>, Youngsoo Jun<sup>3,4</sup>, Chunghun Lim<sup>1</sup> and Changwook Lee<sup>1,4\*</sup>

<sup>1</sup>Department of Biological Sciences, School of Life Sciences, Ulsan National Institute of Science and Technology, 50 UNIST-gil, Ulsan 44919, Republic of Korea

<sup>2</sup>Department of Biological Sciences, Korea Advanced Institute of Science and Technology, Daejeon 34141, Republic of Korea

<sup>3</sup>School of Life Sciences and <sup>4</sup>Cell Logistics Research Center, Gwangju Institute of Science and Technology, Gwangju 61005, Rep. of Korea.

\*Correspondence to:

**Changwook Lee, Ph.D.**

Department of Biological Sciences, School of Life Sciences

Ulsan National Institute of Science and Technology (UNIST)

50 UNIST-gil, Ulsan 44919, Republic of Korea.

Telephone – 82-52-217-2534; Fax – 82-52-217-2639

E-mail – [changwook@unist.ac.kr](mailto:changwook@unist.ac.kr)

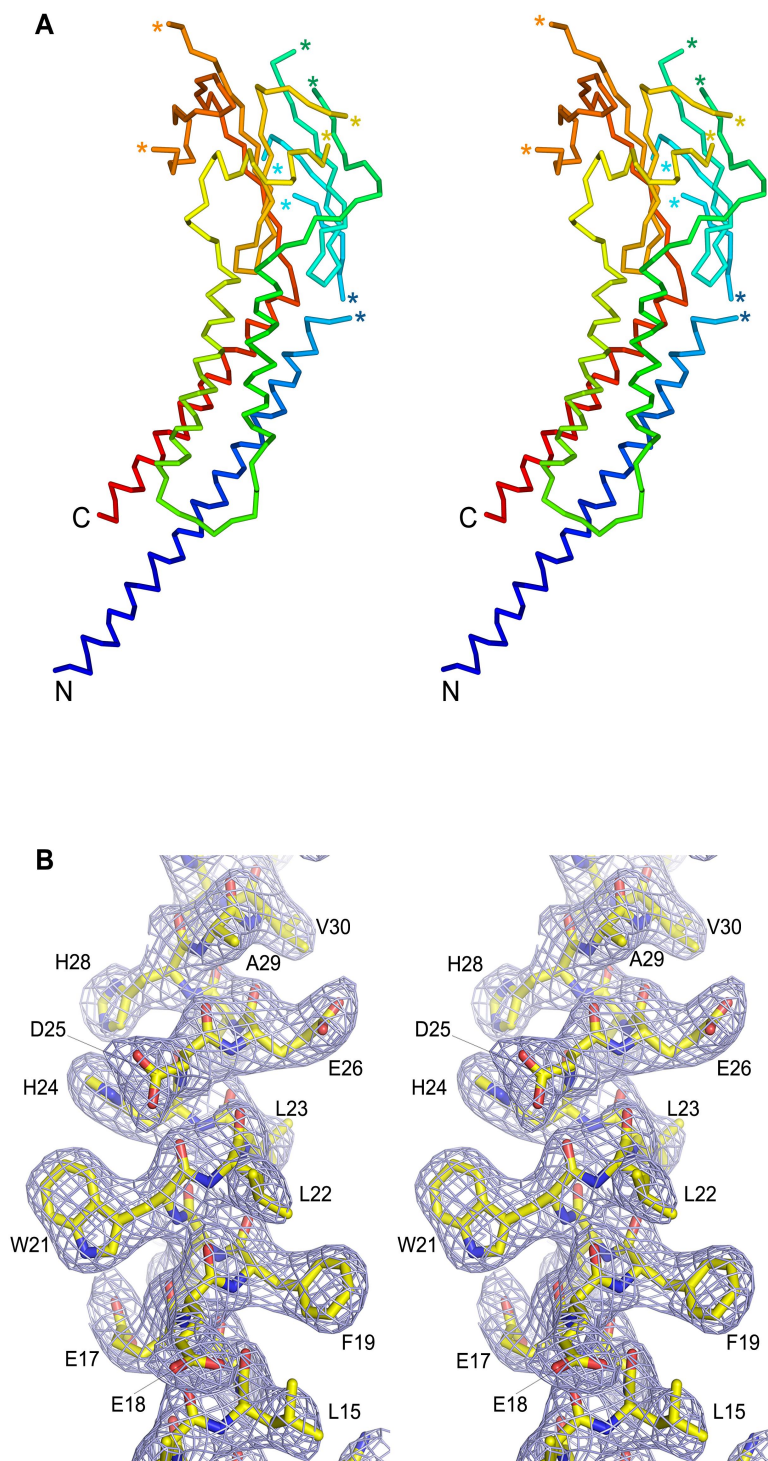

**Figure S1. Stereo images of full-length Rogdi<sup>H</sup>**

(A) The stereo view shows the backbone trace of full-length Rogdi<sup>H</sup>. The residues 48–56, 64–68, 94–96, 181, and 212–221 are disordered and indicated by blue, cyan green, yellow, and orange stars, respectively.

(B) The 2.8 Å resolution 2Fo-Fc electron density (contoured at 1σ) of the H1 in the α domain was shown with a final model to represent the quality of structural data.
